# Supplementary material
Source: PubMed Central journal article supplement (PMC6258918)
Supplement: ba024968-suppl1.pdf [file ba024968-suppl1.pdf]

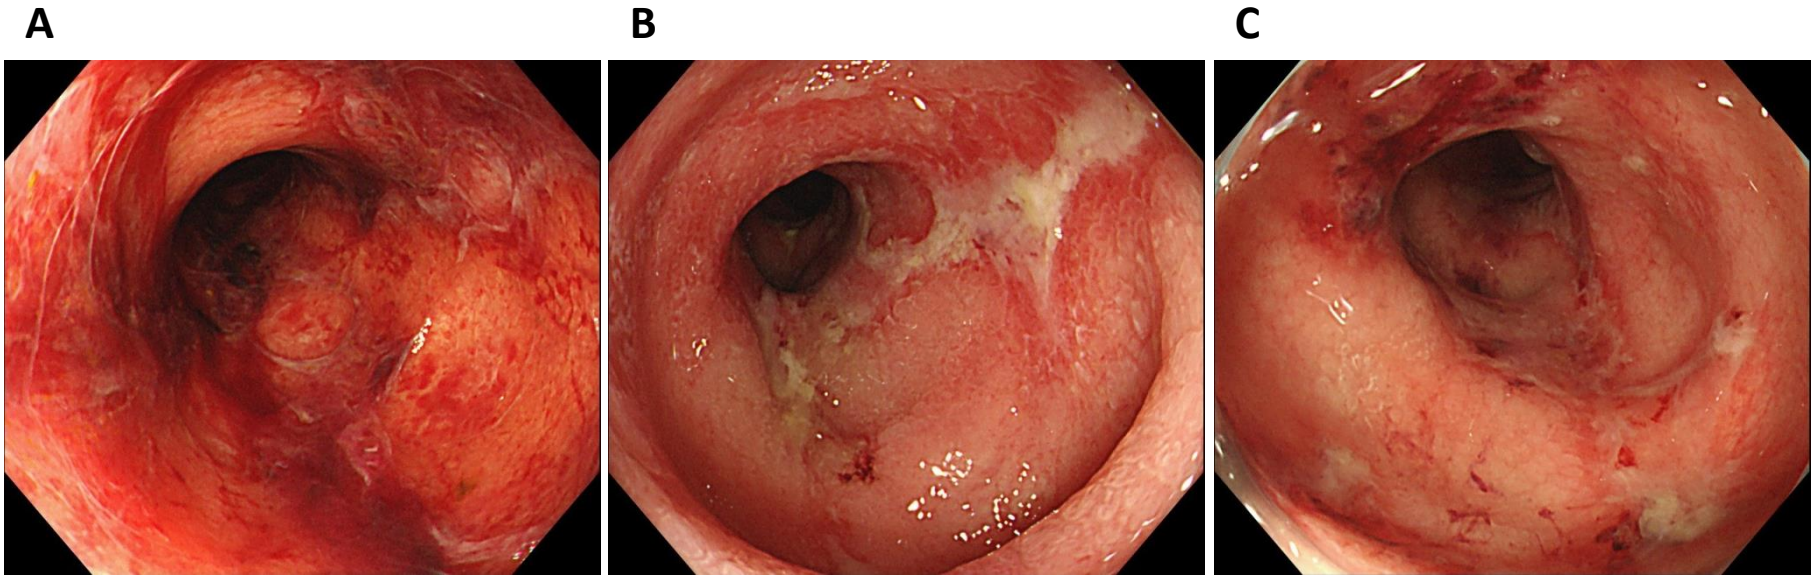

Figure S1. The findings on colonoscopy. (A) Almost totally denuded mucosa was found in the sigmoid colon before FMT. The intestinal mucosa gradually regenerated after (B) the first and (C) second FMT.
